# Supplementary material for: Impact of intercropping on the coupling between soil microbial community structure, activity, and nutrient-use efficiencies
Source: PeerJ. 2019 Feb 8;7:e6412. doi: 10.7717/peerj.6412 (PMC6369829; doi:10.7717/peerj.6412)
Supplement: Supplemental Information 9 [file peerj-07-6412-s009.csv]

	pH	SOC	TN	NO3--N	NH4+-N	DOC	DON	MBC	MBN	Available N
		(g kg-1)	(g kg-1)	(mg kg-1)	(mg kg-1)	(mg kg-1)	(mg kg-1)	(mg kg-1)	(mg kg-1)	(mg kg-1)
M-Sugarcane1	6.7	16.53	0.777	5.59	1.96	100	0.9	144	6.232	8.45
M-Sugarcane2	6.8	16.23	0.759	6.35	2.23	98	0.896	106	7.03	9.476
M-Sugarcane3	6.7	15.98	0.659	5.032	1.86	95	0.923	143	5.932	7.815
I-Sugarcane1	6	17.25	0.813	8.1	0.75	112	0.8	189	8.23	9.65
I-Sugarcane2	6.1	16.9	0.822	8.35	0.65	105	0.823	192	8.56	9.823
I-Sugarcane3	6.3	17.29	0.799	7.86	0.85	110	0.756	213	7.56	9.466
M-Soybean1	5.9	16.67	0.784	6.43	4.76	90	0.6	153	5.65	11.79
M-Soybean2	5.8	15.65	0.806	5.956	4.92	89	0.53	103	5.63	11.406
M-Soybean3	6.2	16.59	0.832	7.65	5.32	92	0.722	143	5.53	13.692
I-Soybean1	5.5	16.95	0.759	11.59	0.97	103	1.1	256	6.62	13.66
I-Soybean2	5.4	17	0.801	10.23	1.23	110	1.232	203	7.12	12.692
I-Soybean3	5.5	16.85	0.736	9.23	1.32	105	0.953	243	6.32	11.503
